# Supplementary material for: Replication stress induces accumulation of FANCD2 at central region of large fragile genes
Source: PubMed Central journal article supplement — Nucleic Acids Res. 2018 Jan 31;46(6):2932–44. doi: 10.1093/nar/gky058 (PMC5888676; doi:10.1093/nar/gky058), 2018-01-31
Supplement: gky058_supp.pdf [file gky058_supp.pdf]

## Supplementary information for

### Replication stress induces accumulation of FANCD2 at central region of large fragile genes

Yusuke Okamoto<sup>1,2</sup>, Watal M. Iwasaki<sup>3</sup>, Kazuto Kugou<sup>4,#</sup>, Kazuki K. Takahashi<sup>3</sup>, Arisa Oda<sup>4</sup>, Koichi Sato<sup>5,\*</sup>, Wataru Kobayashi<sup>5</sup>, Hidehiko Kawai<sup>6</sup>, Ryo Sakasai<sup>7</sup>, Akifumi Takaori-Kondo<sup>2</sup>, Takashi Yamamoto<sup>8</sup>, Masato T. Kanemaki<sup>9,10</sup>, Masato Taoka<sup>11</sup>, Toshiaki Isobe<sup>11</sup>, Hitoshi Kurumizaka<sup>5</sup>, Hideki Innan<sup>3</sup>, Kunihiro Ohta<sup>4</sup>, Masamichi Ishiai<sup>1</sup>, Minoru Takata<sup>1\*\*</sup>

<sup>1</sup> Laboratory of DNA Damage Signaling, Department of Late Effects Studies, Radiation Biology Center, Kyoto University, Kyoto Japan

<sup>2</sup> Department of Hematology and Oncology, Graduate School of Medicine, Kyoto University, Kyoto, Japan

<sup>3</sup> SOKENDAI (The Graduate University for Advanced Studies), Hayama, Japan

<sup>4</sup> Department of Life Sciences, Graduate School of Arts and Sciences, The University of Tokyo, Tokyo, Japan

<sup>5</sup> Laboratory of Structural Biology, Graduate School of Advanced Science and Engineering, Waseda University, Tokyo, Japan

<sup>6</sup> Department of Molecular Radiobiology, Research Institute for Radiation Biology and Medicine, Hiroshima University, Hiroshima, Japan

<sup>7</sup> Department of Biochemistry I, School of Medicine, Kanazawa Medical University, Ishikawa, Japan.

<sup>8</sup> Department of Mathematical and Life Sciences, Graduate School of Science, Hiroshima University, 1-3-1 Kagamiyama, Higashi-Hiroshima, Hiroshima 739-8526, Japan

<sup>9</sup> Division of Molecular Cell Engineering, National Institute of Genetics, Research Organization of Information and Systems (ROIS), Mishima, Shizuoka 411-8540, Japan

<sup>10</sup> Department of Genetics, SOKENDAI, Mishima, Shizuoka 411-8540, Japan

<sup>11</sup> Department of Chemistry, Graduate School of Science and Engineering, Tokyo

Metropolitan University, Hachioji, Tokyo 192-0397, Japan

# Present address: Department of Frontier Research, Kazusa DNA Research Institute, Kisarazu, Japan

\* Present address: Hubrecht Institute-KNAW & University Medical Center Utrecht, Utrecht, the Netherlands

\*\* To whom correspondence should be addressed: Tel: +81-75-753-7563; Fax: +81-75-753-7564; E-mail: mtakata@house.rbc.kyoto-u.ac.jp

Supplementary Figures

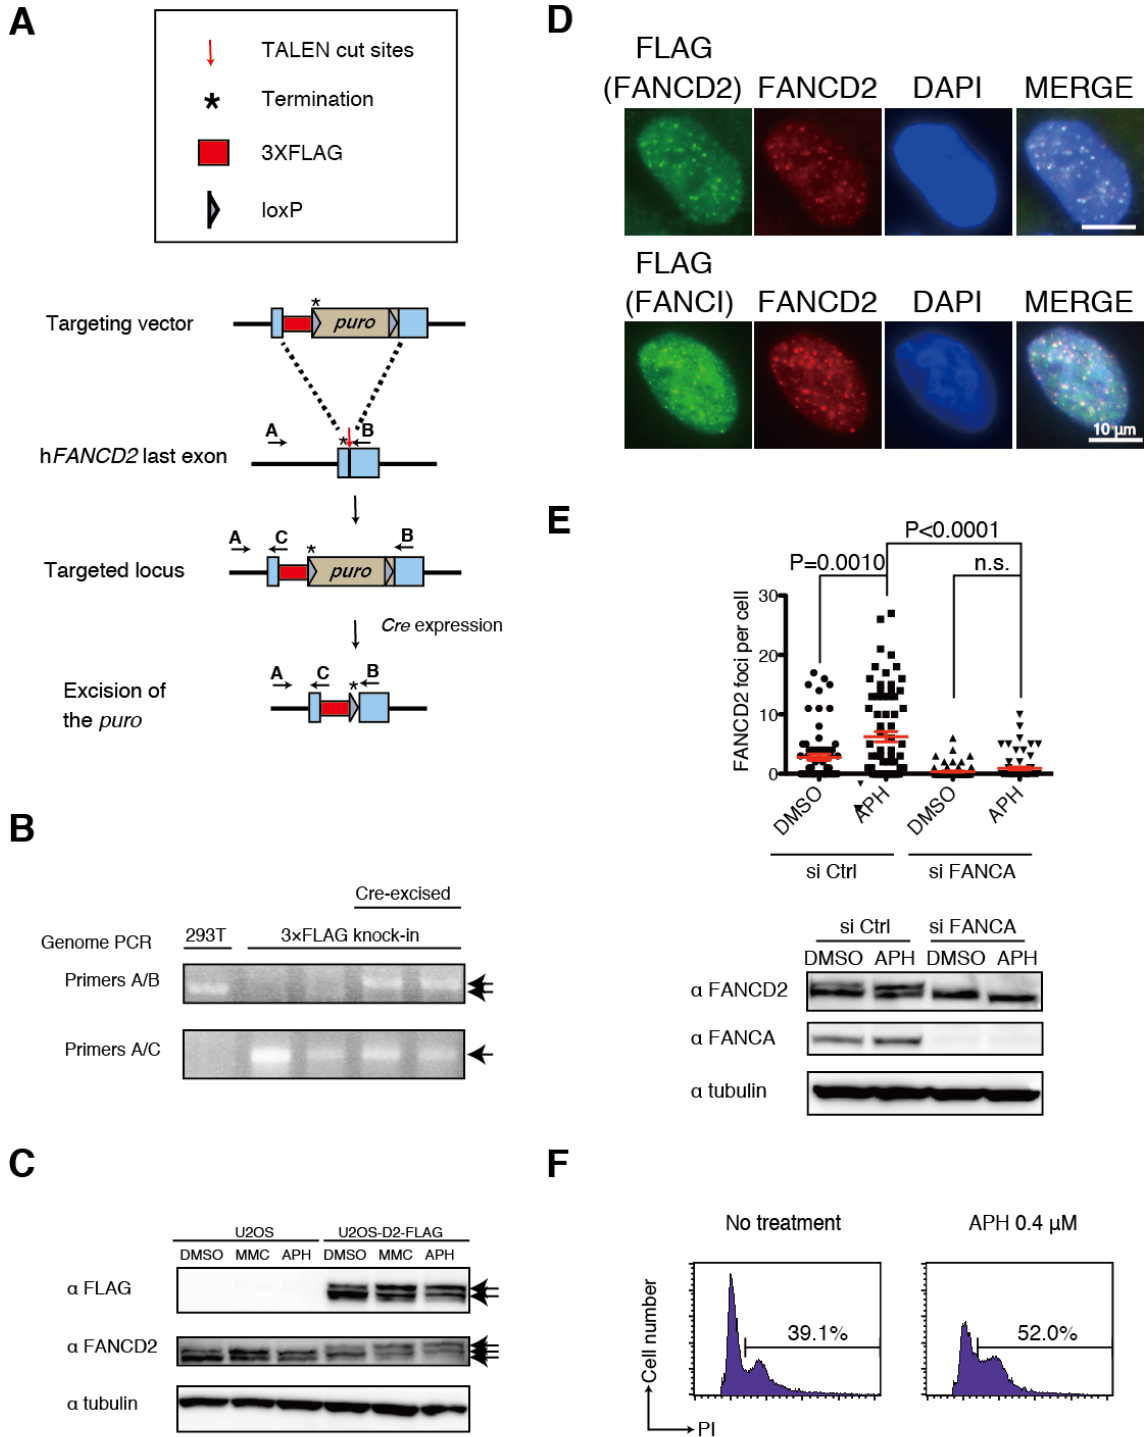

Figure S1

**Supplementary Figure 1. Generation of U2OS-D2-FLAG cells using TALEN genome editing enzyme targeting the last exon of *FANCD2*, and the *FANCD2*-3xFLAG knock-in vector**

(A) A schematic showing the strategy to knock in the 3xFLAG tag into the termination codon of *FANCD2* in U2OS cells.

(B) Obtained cell clones were verified by genomic PCR using primers indicated in (A).

(C) Parental U2OS and U2OS-D2-FLAG cells were subjected to western blotting using anti-FANCD2 and anti-FLAG antibodies. Cells were stimulated by the indicated reagents, and whole cell lysates were prepared and analyzed.

(D) Detection of FANCD2 and FANCI foci in U2OS-D2-FLAG or U2OS cells transiently transfected with FLAG-FANCI using anti-FLAG and anti-FANCD2. Cells were treated with 0.4  $\mu$ M APH for 24 hr, fixed, and stained.

(E) *FANCA* depletion by siRNA abrogated FANCD2 foci and monoubiquitination in U2OS cells treated with 0.4  $\mu$ M APH for 24 hr. Means  $\pm$ SEM from  $n > 50$  nuclei are shown. P-values were calculated by unpaired, two-tailed Student's *t* test.

(F) Flow cytometric analysis of the cell cycle profile in U2OS cells treated with 0.4  $\mu$ M APH for 24 hr. Cells were fixed in 70% Ethanol, stained with Propidium Iodide, and analyzed using a FACSCalibur flow cytometer (Becton-Dickinson).

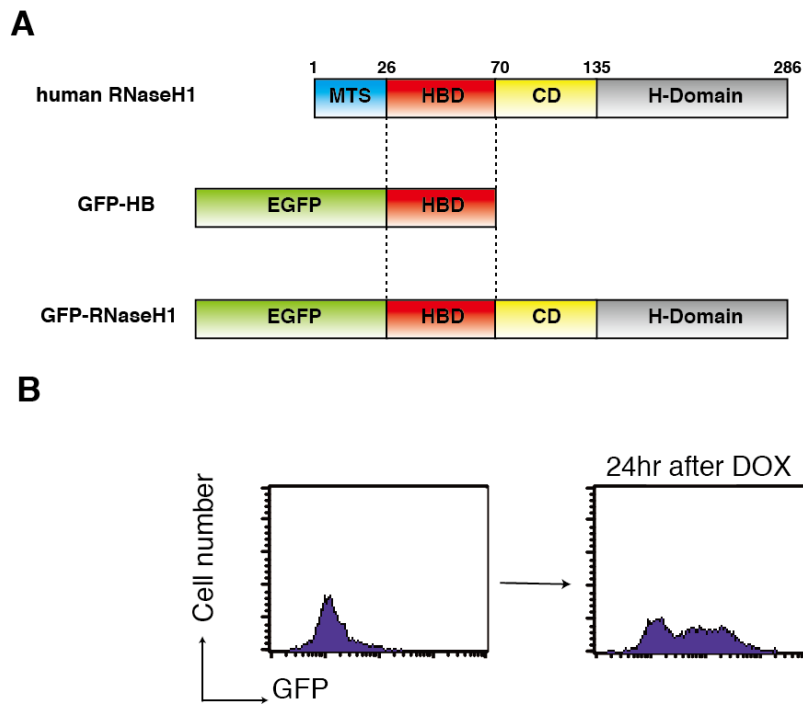

**Figure S2**

**Supplementary Figure 2. Generation of U2OS stably expressing dox-inducible GFP-HBD**

(A) Schematic depicting wild-type RNaseH1 and the HBD domain each fused with the GFP fragment.

(B) U2OS-D2-FLAG cells stably expressing GFP-HBD were induced by treatment with 2  $\mu$ g/ml doxycycline for 24 hr. GFP expression levels were evaluated with a FACSCalibur flow cytometer (Becton-Dickinson).

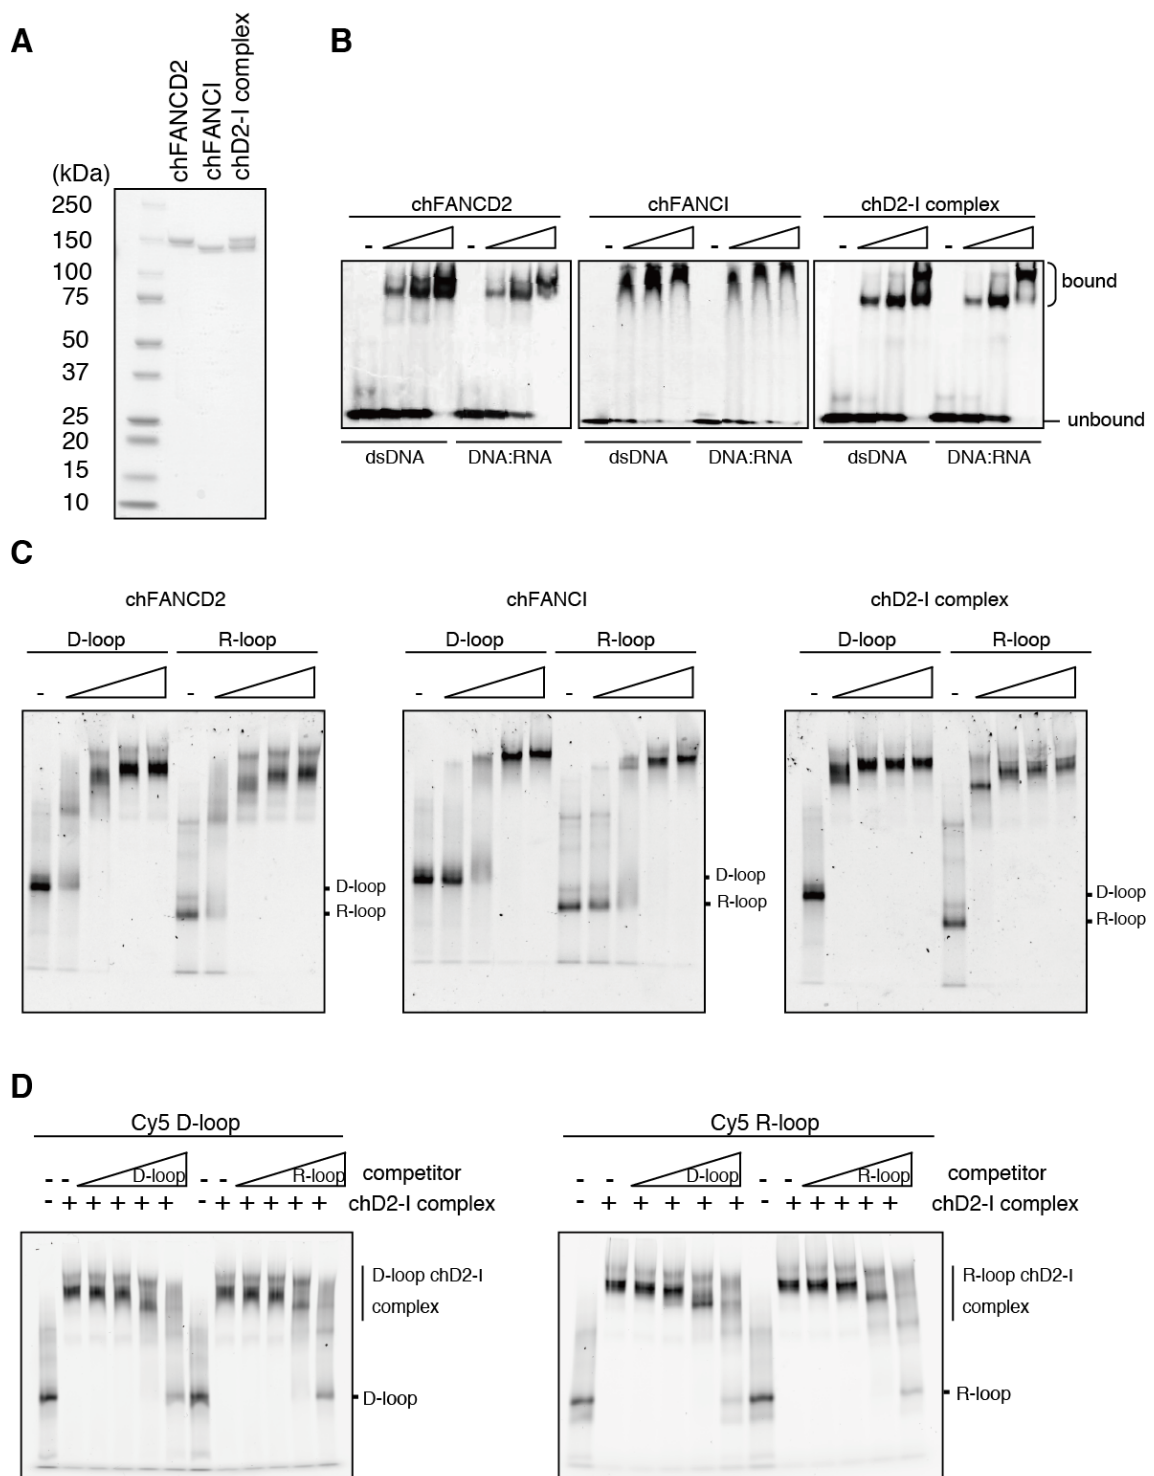

**Figure S3**

**Supplementary Figure S3. FANCD2 and the D2-I complex binding of D-loop or R-loop *in vitro***

(A) The purified chicken FANCD2 and FANCI proteins. FANCD2 and FANCI were analyzed by SDS-PAGE with Coomassie Brilliant Blue staining.

(B) Gel shift assay with FANCD2, FANCI and the D2-I complex with dsDNA or DNA:RNA hybrid. Equimolar amounts of the synthetic dsDNA (5  $\mu\text{M}$ ) as well as DNA:RNA hybrid (5  $\mu\text{M}$ ) were incubated with increasing amounts of FANCD2 (0, 0.1, 0.2, and 0.4  $\mu\text{M}$ ), FANCI (0, 0.6, 1.2, and 1.8  $\mu\text{M}$ ), or the D2-I complex (0, 0.05, 0.10, and 0.20  $\mu\text{M}$ ) at 37°C for 10 min. The samples were then separated by 3.5 % PAGE in 0.2 x TBE buffer, and the bands were visualized by SYBR Gold staining.

(C) Gel shift assay with FANCD2, FANCI and the D2-I complex with D-loop or R-loop. Equimolar amounts of the synthetic D-loop (5  $\mu\text{M}$ ) as well as R-loop (5  $\mu\text{M}$ ) were incubated with increasing amounts of FANCD2 or FANCI (0, 0.1, 0.2, 0.4, and 0.6  $\mu\text{M}$ ) or the D2-I complex (0, 0.1, 0.2, 0.3, and 0.4  $\mu\text{M}$ ) at 37°C for 10 min. The samples were then separated by 3.5 % PAGE in 0.2 x TBE buffer, and the bands were visualized by SYBR Gold staining.

(D) Competition assay with D-loop and R-loop. Cy5-labeled D-loop (2.5  $\mu\text{M}$ ) or R-loop (2.5  $\mu\text{M}$ ) and D2-I complex (0.2  $\mu\text{M}$ ) were incubated with increasing amounts of unlabeled competitor D-loop (2.5, 5.0, 12.5, and 25  $\mu\text{M}$ ) or R-loop (2.5, 5.0, 12.5, and 25  $\mu\text{M}$ ) at 37°C for 10 min. The samples were then separated by 3.5 % PAGE in 0.2 x TBE buffer, and the bands were detected by Amersham Typhoon (GE Healthcare).

## Supplementary Table 1. Oligonucleotides used in this study.

| TALEN                                          |                                                                                                   |
|------------------------------------------------|---------------------------------------------------------------------------------------------------|
| primer                                         | sequence                                                                                          |
| KD12-106                                       | 5'- CAGGCGCCGCGGTGGGAGGGTTGCTCAAGCCCAGGAGG -3'                                                    |
| KD12-107                                       | 5'- AAGAATTCATCAGAGTCATCATAACTCTCATCACTATC -3'                                                    |
| KD12-108                                       | 5'- TTGAATTCAGACCCAGATAAAATTGTTGCTGCTTCT -3'                                                      |
| KD12-109                                       | 5'- TAGTCGACCTATACAGGGGCTGAGACAGGAGAA -3'                                                         |
| ChIP qPCR                                      |                                                                                                   |
| primer                                         | sequence                                                                                          |
| KD15-215                                       | 5'- GAGGCTAGCACCAAGGTCTG -3'                                                                      |
| KD15-216                                       | 5'- ACTGGCTGAGGCTACCAGAA -3'                                                                      |
| KD15-282                                       | 5'- GAGGCCAGGACACATAGAA -3'                                                                       |
| KD15-283                                       | 5'- GCAAAGGCTAACATGCAGA -3'                                                                       |
| KD15-221                                       | 5'- TGTTGCGAAGAACCTGTGAG -3'                                                                      |
| KD15-222                                       | 5'- ACTCCTATGGCTCTGCTGGA -3'                                                                      |
| KD15-375                                       | 5'- CAGCCAGCACTCCTTCTCAA -3'                                                                      |
| KD15-376                                       | 5'- CTCTGTGGAGAAGCCAAGCA -3'                                                                      |
| KD15-247                                       | 5'- CGGGAGACATCCTCGAAATA -3'                                                                      |
| KD15-248                                       | 5'- CCTAGCACCAGGCTTGTCTG -3'                                                                      |
| KD15-385                                       | 5'- GCCTATACCGAAGACTGTGTG -3'                                                                     |
| KD15-386                                       | 5'- GGCTGCTCAGAAGACACTTTA -3'                                                                     |
| siRNA                                          |                                                                                                   |
| siRNA                                          | sequence                                                                                          |
| FANCD2                                         | 5'- CAGAGUUUGCUUCACUCUCUATT -3'                                                                   |
| FANCA                                          | 5'- AAGGGUCAAGAGGGAAAAUA -3'                                                                      |
| Luciferase                                     | 5'- UCGAAGUAUCCGCGUACGTT -3'                                                                      |
| DNA:RNA hybrid binding assay                   |                                                                                                   |
| oligonucleotide                                | sequence                                                                                          |
| DNA forward                                    | 5'- ATCGATGCTCTAGACAGCTGCTCAGGATTGATCTGTAATGGCCTGGGA -3'                                          |
| DNA reverse                                    | 5'- TCCAGGCCATTACAGATCAATCCTGAGCAGCTGTCTAGA GACATCGAT -3'                                         |
| RNA forward                                    | 5'- AUCGAUGUCUCUAGACAGCUGCUCAGGAUUGAUCUGUAAUGGCCUGGGA -3'                                         |
| RNA reverse                                    | 5'- UCCAGGCCAUUACAGAUCAAUCCUGAGCAGCUGUCUAGAGACAUCGAU -3'                                          |
| D-loop or R-loop binding and competition assay |                                                                                                   |
| oligonucleotide                                | sequence                                                                                          |
| Oligo DNA A                                    | 5'- CATTGCATATTTAAAACATGTTGGAAGGCTCGATGCATGCTGATAGCCTACTAGTGTGCTGGCTTCAAATGACCTCTTATCAAGTGAC -3'  |
| Cy5-Oligo DNA A                                | 5'- CATTGCATATTTAAAACATGTTGGAAGGCTCGATGCATGCTGATAGCCTACTAGTGTGCTGGCTTCAAATGACCTCTTATCAAGTGAC -3'  |
| Oligo DNA B                                    | 5'- GTCACCTTGATAAGAGGTCATTTGAATTCATGGCTTAGAGCTTAATTGCTGAATCTGGTGTGGATCCAACATGTTTTAAATATGCAATG -3' |
| Oligo DNA C                                    | 5'- CTGCTACGATGCTAGTCTAGCTCGGCAGTCTAGCAGGTTCCAGCACCAGATTAGCAATTAAGTCTAAGCCATGAA -3'               |
| Oligo RNA D                                    | 5'- CUCGUACGAGUCUAGUCGAGUCGCGGAGUCGAGCAGGUUCCAGCACCAGAUUCAGCAAUAAGCUCUAAGCCAUGAA -3'              |
